# Supplementary material
Source: PubMed Central journal article supplement (PMC9169115)
Supplement: NIHMS1796186-supplement-Supplementary_Information.pdf [file NIHMS1796186-supplement-Supplementary_Information.pdf]

**Supplementary information**

---

**The neural mechanisms of manual dexterity**

---

In the format provided by the authors and unedited

SUPPLEMENTARY INFORMATION

Table 1. Muscles important for actuating wrist joint<sup>1,2</sup>. Extrinsic: 11 (12 MTUs), intrinsic: 1 (1).

| Name                                  | Notes                                                                                                         |
|---------------------------------------|---------------------------------------------------------------------------------------------------------------|
| <i>Flexor Carpi Ulnaris</i>           | Flexion and ulnar deviation (adduction, towards pinky).                                                       |
| <i>Flexor Carpi Radialis</i>          | Flexion and radial deviation (abduction, towards index).                                                      |
| <i>Extensor Carpi Ulnaris</i>         | Extension and ulnar deviation.                                                                                |
| <i>Extensor Carpi Radialis Longus</i> | Extension and radial deviation.                                                                               |
| <i>Extensor Carpi Radialis Brevis</i> | Extension and radial deviation.                                                                               |
| <i>Palmaris Longus</i>                | Flexor, lacks in 5-64% of population depending on nationality, lies outside of carpal tunnel <sup>3,4</sup> . |
| <i>Palmaris Brevis</i>                | Located in hand, protects ulnar nerve and artery from compression.                                            |
| <i>Biceps Brachii</i>                 | Elbow-crossing strongest supinator with two heads, does not cross carpus.                                     |
| <i>Brachioradialis</i>                | Elbow-crossing, rotates the wrist to neutral from pronated and supinated positions.                           |
| <i>Supinator</i>                      | Proximal on forearm, does not cross carpus.                                                                   |
| <i>Pronator Teres</i>                 | Proximal on forearm, does not cross carpus.                                                                   |
| <i>Pronator Quadratis</i>             | Distal on forearm, does not cross carpus.                                                                     |

Table 2. Muscles mainly actuating fingers 2-5<sup>1,2</sup>. Pinky finger muscles ODM, FDM and ADM form hypothenar eminence. Extrinsic: 5 (14), intrinsic: 14 (14).

| Name                                  | Notes                                                                                                                                                |
|---------------------------------------|------------------------------------------------------------------------------------------------------------------------------------------------------|
| <i>Flexor Digitorum Superficialis</i> | Extrinsic, head for each finger, attaches at middle phalanx. Two proximal heads, attaching to radius on one side and ulna with humerus on the other. |
| <i>Flexor Digitorum Profundus</i>     | Extrinsic, head for each finger, attaches at distal phalanx.                                                                                         |
| <i>Extensor Digitorum</i>             | Extrinsic, heads for each finger with interconnected tendons.                                                                                        |
| <i>Extensor Digiti Minimi</i>         | Extrinsic, extends pinky finger.                                                                                                                     |
| <i>Extensor Indicis</i>               | Extrinsic, extends index finger.                                                                                                                     |
| 4 <i>Lumbricales</i>                  | Intrinsic, 4 muscles on the palmar side. Connect 2 tendons: FDP tendon and extensor expansion sheath.                                                |
| 4 <i>Dorsal Interossei</i>            | Intrinsic, 4 muscles. Attach to metacarpal, proximal phalanx and extensor expansion sheath. Abduct fingers (away from middle finger).                |
| 3 <i>Palmar Interossei</i>            | Intrinsic, 3 muscles, attach to extensor expansion sheath of 2 <sup>nd</sup> , 4 <sup>th</sup>                                                       |

|                               |                                                                      |
|-------------------------------|----------------------------------------------------------------------|
|                               | and 5 <sup>th</sup> fingers. Adduct fingers (towards middle finger). |
| <i>Opponens Digiti Minimi</i> | Intrinsic, actuates pinky finger.                                    |
| <i>Flexor Digiti Minimi</i>   | Intrinsic, actuates pinky finger.                                    |
| <i>Abductor Digiti Minimi</i> | Intrinsic, actuates pinky finger.                                    |

Table 3. Muscles mainly actuating thumb<sup>1,2</sup>. FPB, FBP2, APB, OP, AP and APA form thenar eminence. Extrinsic: 4 (4), intrinsic: 6 (7).

| Name                                 | Notes                                                                                                                                        |
|--------------------------------------|----------------------------------------------------------------------------------------------------------------------------------------------|
| <i>Extensor Pollicis Longus</i>      | Extrinsic.                                                                                                                                   |
| <i>Extensor Pollicis Brevis</i>      | Extrinsic, present in humans, gibbons, and bonobos.                                                                                          |
| <i>Flexor Pollicis Longus</i>        | Extrinsic, present in humans, gibbons, and bonobos.                                                                                          |
| <i>Abductor Pollicis Longus</i>      | Extrinsic.                                                                                                                                   |
| <i>Flexor Pollicis Brevis</i>        | Intrinsic.                                                                                                                                   |
| <i>Flexor Brevis Profundus 2</i>     | Intrinsic, deep head of <i>flexor pollicis brevis</i> .                                                                                      |
| <i>Abductor Pollicis Brevis</i>      | Intrinsic.                                                                                                                                   |
| <i>Opponens Pollicis</i>             | Intrinsic.                                                                                                                                   |
| <i>Adductor Pollicis</i>             | Intrinsic, two heads: transverse and oblique.                                                                                                |
| <i>Adductor Pollicis Accessorius</i> | Intrinsic, first <i>palmar interosseus</i> , also called <i>interosseus volaris primus of Henle</i> . Absent in some people <sup>5,6</sup> . |

## REFERENCES

1. Diogo, R. & Wood, B. A. *Comparative Anatomy and Phylogeny of Primate Muscles and Human Evolution*. (Oxford: Taylor and Francis, 2012).
2. Lemelin, P. & Diogo, R. Anatomy, Function, and Evolution of the Primate Hand Musculature. in *The Evolution of the Primate Hand* (eds. Kivell, T. L., Lemelin, P., Richmond, B. G. & Schmitt, D.) (2016).
3. Sebastin, S. J., Lim, A. Y. T., Bee, W. H., Wong, T. C. M. & Methil, B. V. Does the absence of the palmaris longus affect grip and pinch strength? *Journal of Hand Surgery* **30**, 406–408 (2005).
4. Sebastin, S. J., Puhaindran, M. E., Lim, A. Y. T., Lim, I. J. & Bee, W. H. The prevalence of absence of the palmaris longus - A study in a Chinese population and a review of the literature. *Journal of Hand Surgery* **30**, 525–527 (2005).
5. Susman, R. S., Nyati, L. & Jassal, M. S. Observations on the pollical palmar interosseous muscle (of Henle). *The Anatomical Record* **254**, 159–165 (1999).
6. Bello-Hellegouarch, G. *et al.* “Pollical palmar interosseous muscle” (musculus adductor pollicis accessorius): Attachments, innervation, variations, phylogeny, and implications for human evolution and medicine. *Journal of Morphology* **274**, 275–293 (2013).
